# Supplementary material for: Exploiting the silent upconversion emissions from a single β-NaYF4:Yb/Er microcrystal via saturated excitation
Source: Royal Society of Chemistry journal article supplement (doi:10.1039/c8tc02193g), 2018-01-01
Supplement: c8tc02193g1.pdf [file c8tc02193g1.pdf]

## Supplementary information of

### Exploiting the silent upconversion emissions from a single $\beta$ - $\text{NaYF}_4\text{:Yb/Er}$ microcrystal via saturated excitation

M. Yuan,<sup>a,b</sup> R. Wang,<sup>a,b</sup> C. Zhang,<sup>a,b</sup> Z. Yang,<sup>a,b</sup> W. Cui,<sup>a,b</sup> X. Yang,<sup>a,b</sup> N. Xiao,<sup>a</sup> H. Wang,<sup>\*a,b,c</sup> and X. Xu,<sup>\*a,b,c,d</sup>

<sup>a</sup>College of Advanced Interdisciplinary Studies, National University of Defense Technology, Changsha, 410073, China.

<sup>b</sup>Interdisciplinary Center for Quantum Information, National University of Defense Technology, Changsha, 410073, China.

<sup>c</sup>Hunan Provincial Key Laboratory of High Energy Laser Technology, Changsha, 410073, China.

<sup>d</sup>Hunan Provincial Collaborative Innovation Center of High Power Fiber Laser, Changsha, 410073, China.

\*[wanghongyan@nudt.edu.cn](mailto:wanghongyan@nudt.edu.cn), and [xuxiaojun@nudt.edu.cn](mailto:xuxiaojun@nudt.edu.cn)

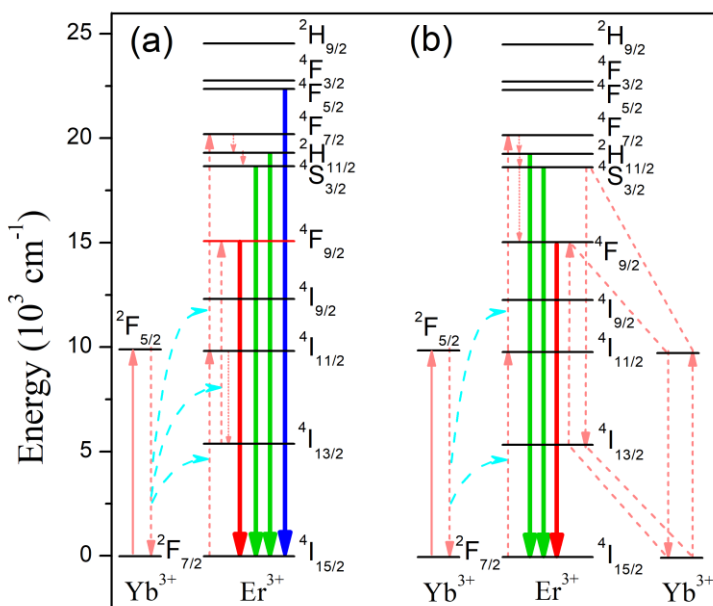

Fig. S1. Schematic diagram of energy transfer mechanism in the (a)  $\text{NaYF}_4\text{:Yb/Er}$  (20/1%) and (b)  $\text{NaYF}_4\text{:Yb/Er}$  (99/1%) microcrystals.

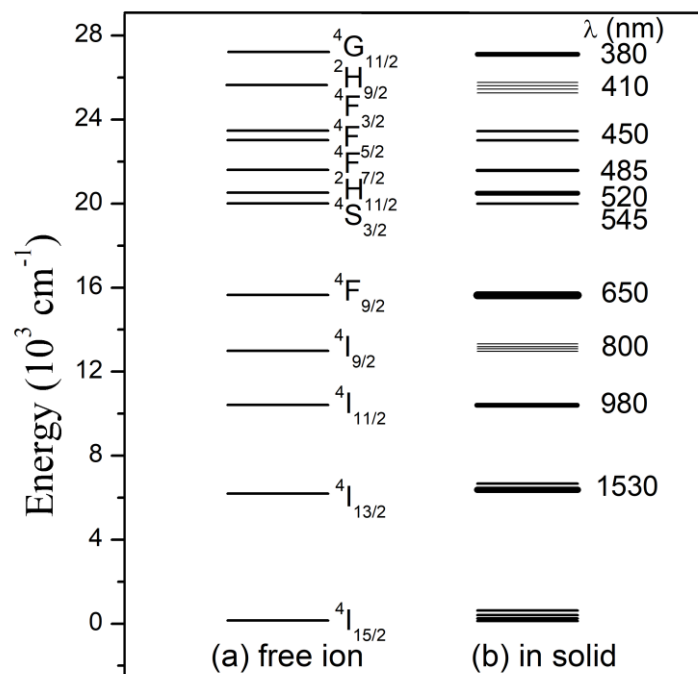

Fig. S2. Energy states of trivalent erbium ( $Er^{3+}$ ) and its corresponding transition wavelength for (a) free ion and (b) in solid host lattices.

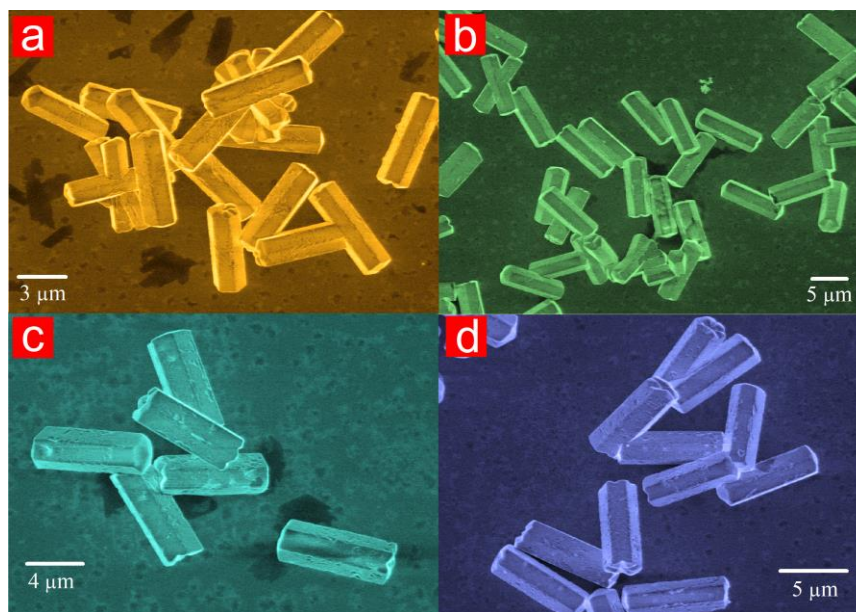

Fig. S3. SEM micrographs of the  $\beta$ - $NaYF_4:Yb/Er$  (x/1%) microcrystals, (a) 40%Yb, (b) 10%Yb, (c) 5%Yb, (d) 2%Yb.

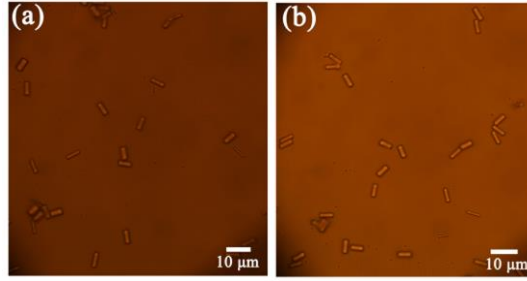

Fig. S4 The microscope images of well-separated (a)  $\beta$ -NaYF<sub>4</sub>:Yb/Er (20/1%) and (b)  $\beta$ -NaYF<sub>4</sub>:Yb/Er (99/1%) microcrystals measured in our experiment.

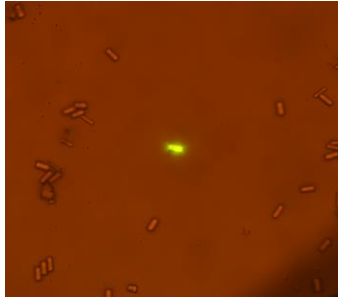

Fig. S5 The microscope image of a single  $\beta$ -NaYF<sub>4</sub>:Yb/Er (20/1%) microcrystal excited under the 980 nm CW laser light.

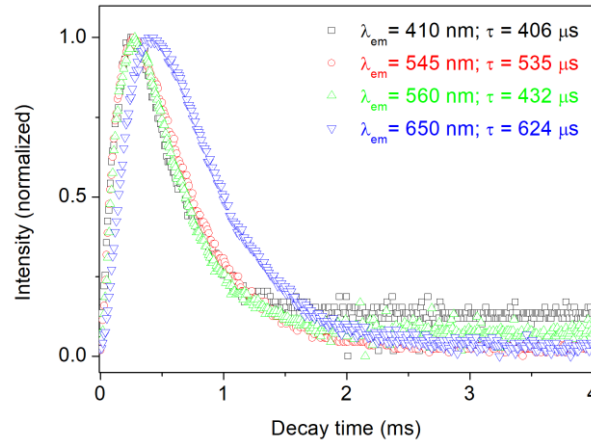

Fig. S6 Decay curves for UC emissions of  $\beta$ -NaYF<sub>4</sub>:Yb/Er (20/1%) microcrystals under low excitation intensity. All excitation wavelengths are at  $\sim$ 980 nm.

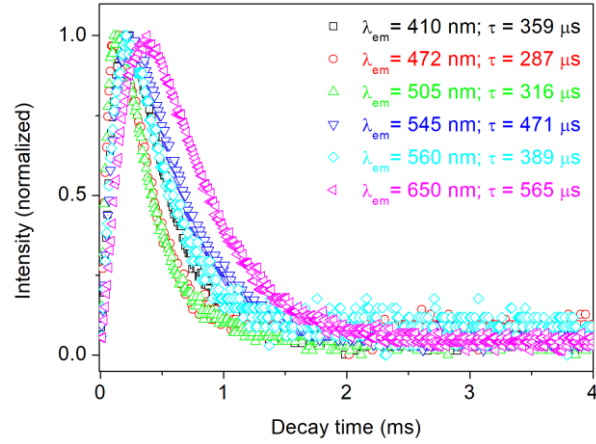

Fig. S7 Decay curves for UC emissions of  $\beta$ -NaYF<sub>4</sub>:Yb/Er (20/1%) microcrystals under high excitation intensity. All excitation wavelengths are at  $\sim$ 980 nm.

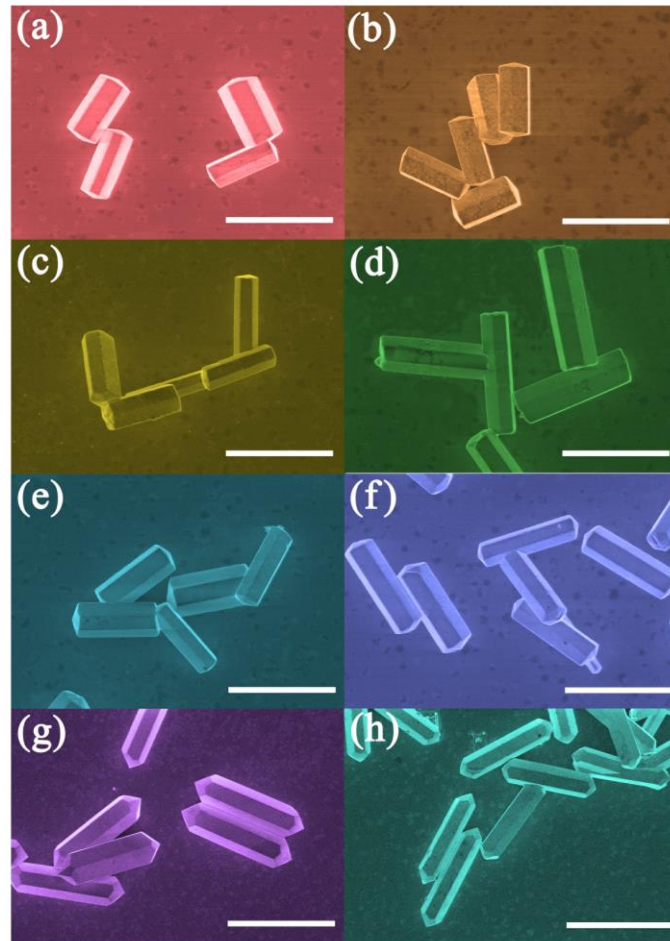

Fig. S8. SEM micrographs of  $\beta$ -NaYF<sub>4</sub>:Yb/Er microcrystals. (a) 20% Yb, 2% Er; (b) 20% Yb, 6% Er; (c) 20% Yb, 10% Er; (d) 20% Yb, 15% Er; (e) 40% Yb, 4% Er; (f) 40% Yb, 8% Er; (g) 80% Yb, 4% Er; (h) 80% Yb, 8% Er. Scale bars are 10  $\mu$ m.

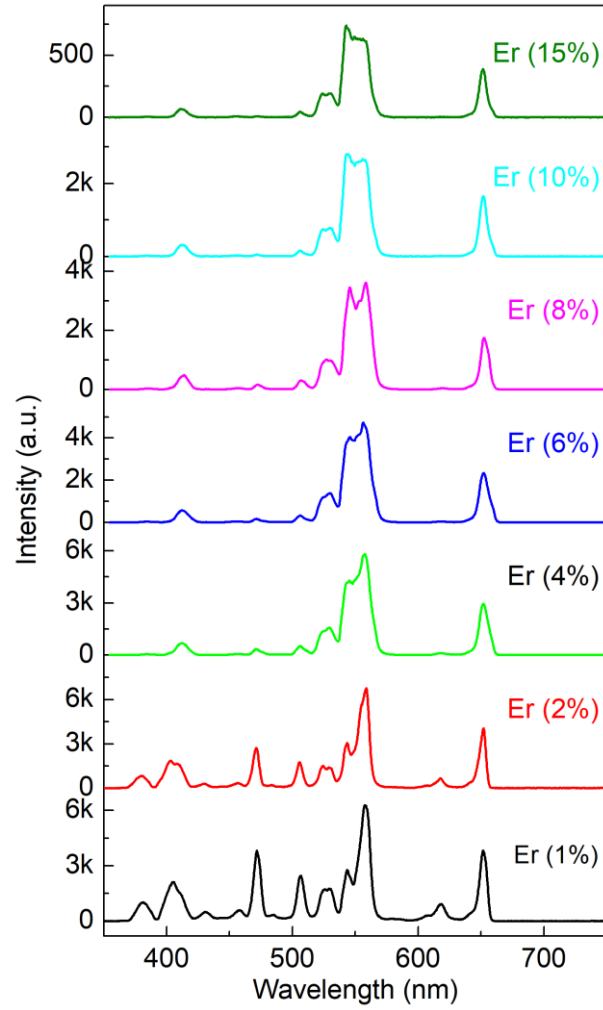

Fig. S9 UC luminescence spectra from a single  $\beta$ -NaYF<sub>4</sub>:Yb/Er (20/x%) microcrystal under the excitation intensity of 796 KW/cm<sup>2</sup>. All excitation wavelengths are at ~980 nm.

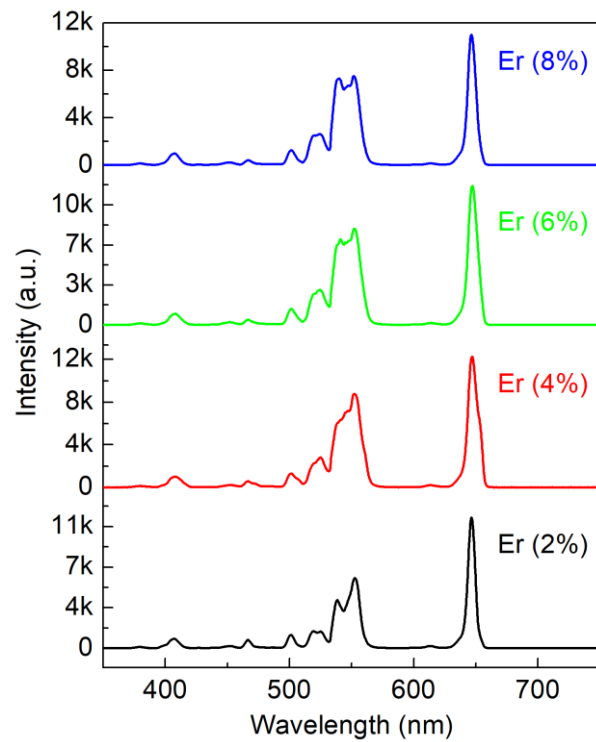

Fig. S10 UC luminescence spectra from a single  $\beta$ -NaYF<sub>4</sub>:Yb/Er (40/x%) microcrystal under the excitation intensity of 796 KW/cm<sup>2</sup>. All excitation wavelengths are at ~980 nm.

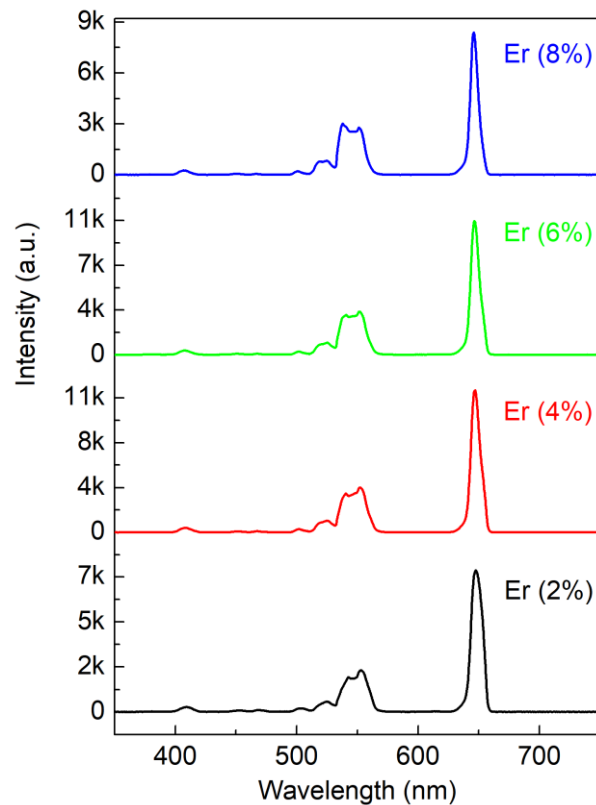

Fig. S11 UC luminescence spectra from a single  $\beta$ -NaYF<sub>4</sub>:Yb/Er (80/x%) microcrystal under the excitation intensity of 796 KW/cm<sup>2</sup>. All excitation wavelengths are at ~980 nm.

Table S1 Calculated CIE coordinates for the single  $\beta$ -NaYF<sub>4</sub>:Yb/Er (x/1%) microcrystal under different excitation intensity. All excitation wavelengths are at ~980 nm.

| $\beta$ -NaYF <sub>4</sub> :Yb/Er (20/1%)  |                | $\beta$ -NaYF <sub>4</sub> :Yb/Er (99/1%)  |                |
|--------------------------------------------|----------------|--------------------------------------------|----------------|
| Excitation intensity (KW/cm <sup>2</sup> ) | CIE            | Excitation intensity (KW/cm <sup>2</sup> ) | CIE            |
| 0.716                                      | (0.303, 0.664) | 4.6                                        | (0.416, 0.533) |
| 9.95                                       | (0.318, 0.605) | 9.55                                       | (0.401, 0.516) |
| 63.7                                       | (0.322, 0.548) | 47.7                                       | (0.393, 0.503) |
| 796                                        | (0.323, 0.395) | 796                                        | (0.367, 0.469) |
